# Supplementary material for: Controlled synthesis of Pt and Co3O4 dual-functionalized In2O3 nanoassemblies for room temperature detection of carbon monoxide
Source: Royal Society of Chemistry journal article supplement (doi:10.1039/c8nj03543a), 2018-01-01
Supplement: c8nj03543a1.pdf [file c8nj03543a1.pdf]

## Supporting Information

### Controlled synthesis of Pt and $\text{Co}_3\text{O}_4$ dual-functionalized $\text{In}_2\text{O}_3$ nanoassemblies for room temperature detection of carbon monoxide

Kuan-Wei Chen, Jen-Pu Liu, Yu-Shan Hsu, Chao-Heng Liu, Ying-Hao Pai,  
and Chun-Hua Chen\*

Department of Materials Science and Engineering, National Chiao Tung University  
1001 Ta-Hsueh Road, Hsin-Chu, Taiwan, 30010, ROC.

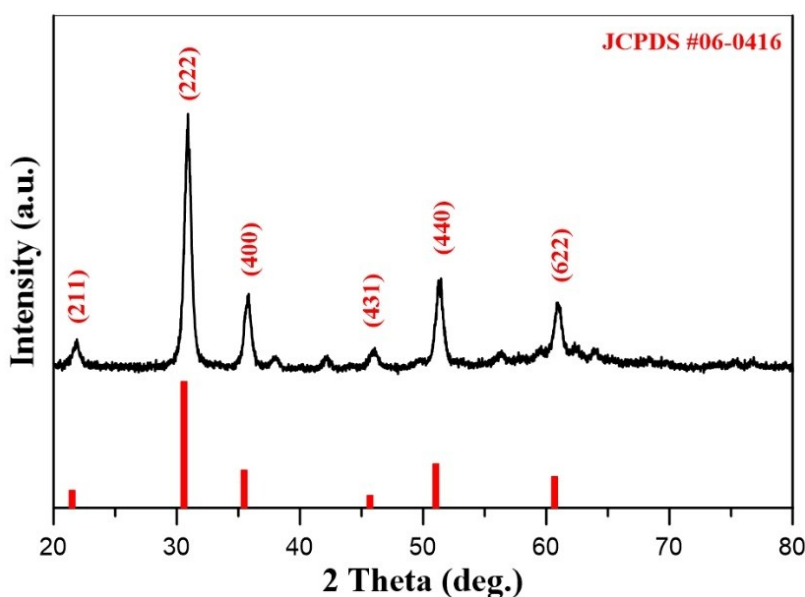

Figure S1. XRD pattern of the prepared  $\text{In}_2\text{O}_3$  nanocomposites.

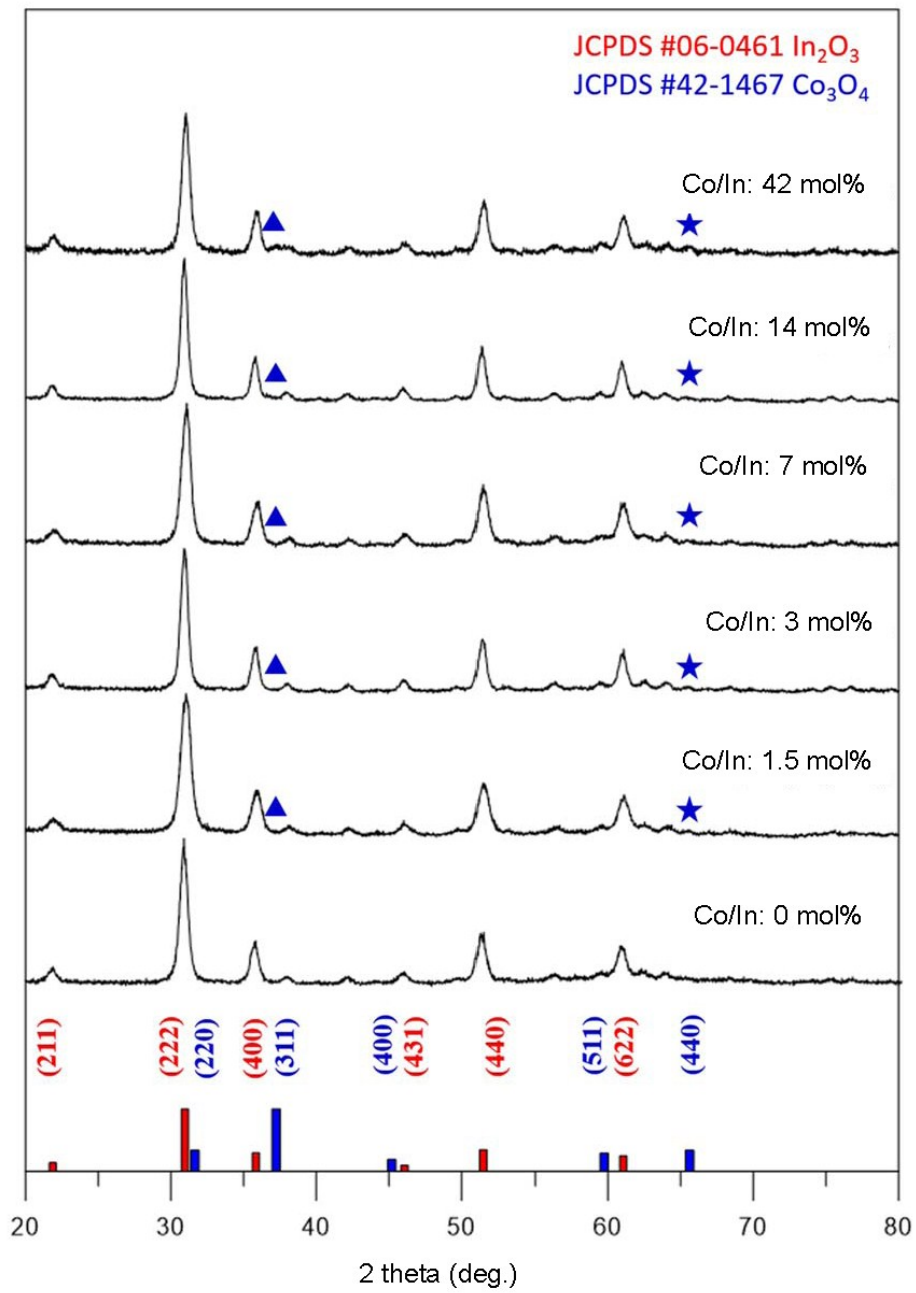

Fig. S2 XRD patterns of pristine  $\text{In}_2\text{O}_3$  nanostructures and  $\text{Co}_3\text{O}_4/\text{In}_2\text{O}_3$  nanostructures with various mole fraction of Co/In.

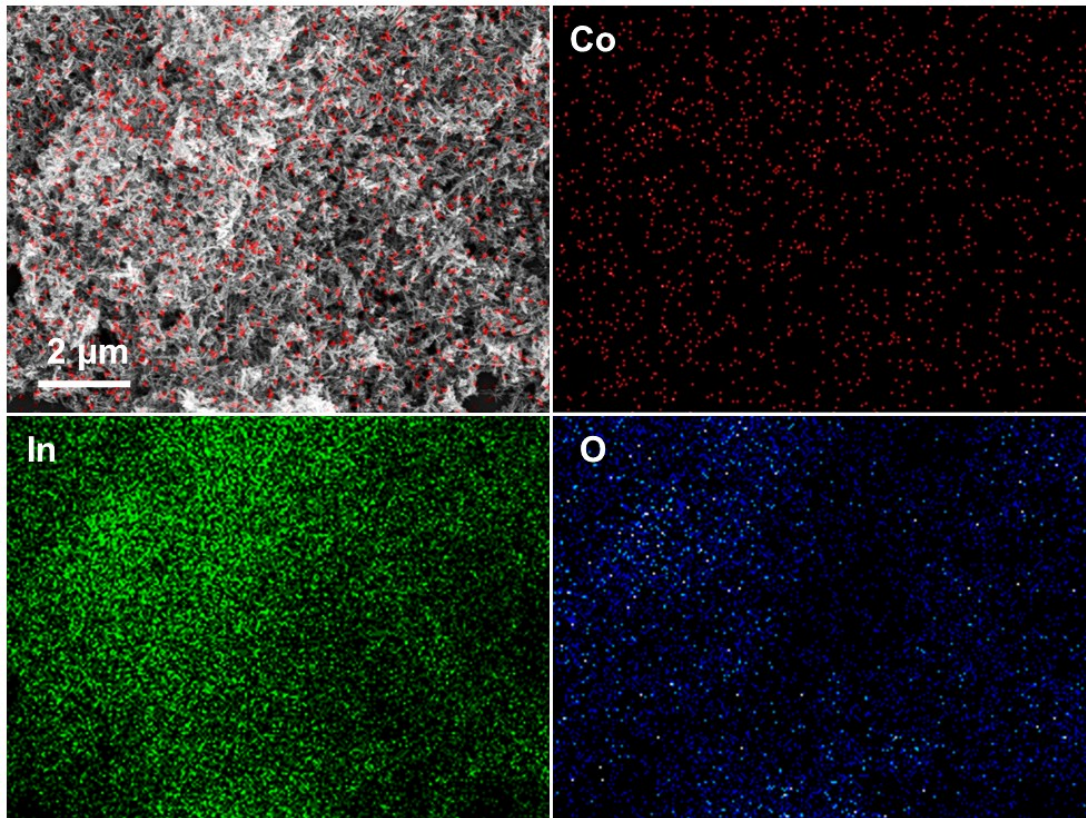

Figure S3. SEM-EDX mapping of the prepared  $\text{Co}_3\text{O}_4\text{-In}_2\text{O}_3$  nanocomposites. The measured atomic ratio of Co/In is 1.7 % (for the specimen of 3 mol%).

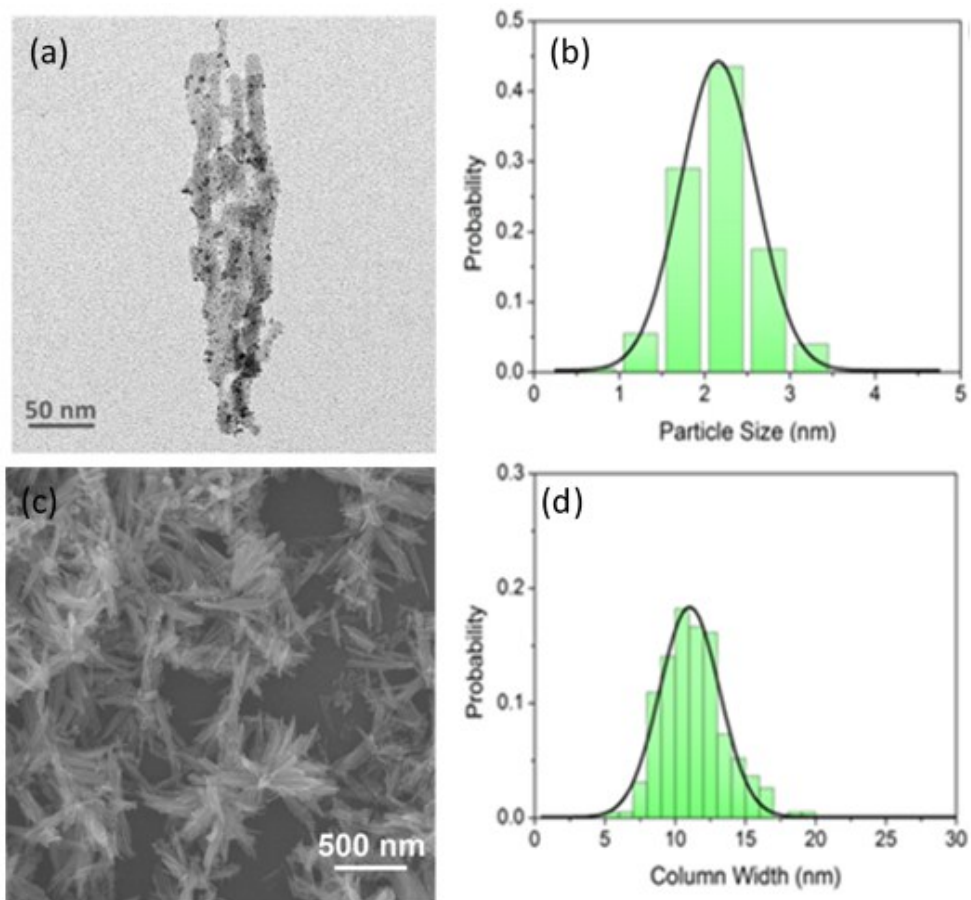

Figure. S4 The size distributions of (a),(b) the Pt nanoparticles, and (c),(d) the In<sub>2</sub>O<sub>3</sub> nanobundles. The averaged particles size and column width is 2.2 nm and 10.6 nm respectively for Pt nanoparticles and In<sub>2</sub>O<sub>3</sub> nanobundles.
